# Supplementary material for: Incretin-based therapies for patients with type 1 diabetes: a meta-analysis
Source: PubMed Central journal article supplement — Endocr Connect. 2019 Jan 28;8(3):277–88. doi: 10.1530/EC-18-0546 (PMC6410765; doi:10.1530/ec-18-0546), 2019-01-28
Supplement: supplementary_material.pdf [file supplementary_material.pdf]

---

## Supplementary materials

### Search strategy for Pubmed

1. "Diabetes Mellitus, Type 1"[Mesh]
2. (type 1[Title/Abstract]) OR type I[Title/Abstract]
3. diabet\*[Title/Abstract]
4. 2 AND 3
5. autoimmune diabetes [Title/Abstract]
6. 1 OR 4 OR 5
7. "Dipeptidyl-Peptidase IV Inhibitors"[Mesh]
8. ((dipeptidyl peptidase) OR dipeptidylpeptidase OR dpp) AND (4 OR IV) AND inhibitor\*[Title/Abstract]
9. gliptin\* OR alogliptin OR anagliptin OR bisegliptin OR carmegliptin OR denagliptin OR dutogliptin OR evogliptin OR gemigliptin OR gosogliptin OR linagliptin OR melogliptin OR omarigliptin OR sitagliptin OR saxagliptin OR teneligliptin OR trelagliptin OR vildagliptin [Title/Abstract]
10. 7 OR 8 OR 9
11. "Glucagon-Like Peptide 1"[Mesh]
12. ((glucagon like peptide\*[Title/Abstract]) OR GLP 1[Title/Abstract]) OR GLP1[Title/Abstract]
13. exenatide OR liraglutide OR albiglutide OR elsiglutide OR lixisenatide OR dulaglutide OR taspoglutide OR semaglutide OR teduglutide [Title/Abstract]
14. 11 OR 12 OR 13
15. 10 OR 14
16. randomized controlled trial[Publication Type]
17. controlled clinical trial[Publication Type]
18. (randomi?ed OR placebo OR randomly) [Title/Abstract]
19. trial[Title]
20. 16 OR 17 OR 18 OR 19
21. 6 AND 16 AND 20

---

### Search strategy for Embase

1. 'insulin dependent diabetes mellitus'/exp
2. (('type 1' OR 'type I') AND diabet\*):ab,ti
3. 1 OR 2
4. 'autoimmune diabetes'/exp
5. ('autoimmune diabetes'):ab,ti
6. 4 OR 5
7. 3 OR 6
8. 'dipeptidyl peptidase iv inhibitor'/exp
9. (('dipeptidyl peptidase' OR dipeptidylpeptidase OR dpp) AND (4 OR IV) AND inhibitor\*):ab,ti
10. (gliptin\* OR alogliptin OR anagliptin OR bisegliptin OR carmegliptin OR denagliptin OR dutogliptin OR evogliptin OR gemigliptin OR gosogliptin OR linagliptin OR melogliptin OR omarigliptin OR sitagliptin OR saxagliptin OR teneligliptin OR trelagliptin OR vildagliptin) :ab,ti
11. 8 OR 9 OR 10
12. 'glucagon like peptide 1'/exp
13. ('glucagon like peptide\*' OR 'GLP 1' OR GLP1):ab,ti
14. (exenatide OR liraglutide OR albiglutide OR elsiglutide OR lixisenatide OR dulaglutide OR taspoglutide OR semaglutide OR teduglutide):ab,ti
15. 12 OR 13 OR 14
16. 11 OR 15
17. 'randomized controlled trial':it
18. 'controlled clinical trial':it
19. (randomised OR randomized OR placebo OR randomly) :ab,ti
20. trial:ti
21. 17 OR 18 OR 19 OR 20
22. 7 AND 16 AND 21

---

**Search strategy for the Cochrane Library**

1. MeSH descriptor: [Stomach Neoplasms] explode all trees
2. (gastric or Stomach):ti,ab,kw (Word variations have been searched)
3. (Cancer or tumor or tumour or carcinoma or neoplas\* or malignan\*):ti,ab,kw (Word variations have been searched)
4. 2 AND 3
5. 1 OR 4
6. MeSH descriptor: [Radiotherapy] explode all trees
7. (radiotherap\* or radio-therap\*):ti,ab,kw (Word variations have been searched)
8. 6 OR 7
9. "randomized controlled trial":pt (Word variations have been searched)
10. "controlled clinical trial":pt (Word variations have been searched)
11. (randomised or randomized or placebo or randomly):ti,ab,kw (Word variations have been searched)
12. trial:ti (Word variations have been searched)
13. 9 OR 10 OR 11 OR 12
14. 5 AND 8 AND 13
